# Supplementary material for: DyCoNet: A Gephi Plugin for Community Detection in Dynamic Complex Networks
Source: PubMed Central journal article supplement (PMC4084810; doi:10.1371/journal.pone.0101357), 2014-07-07
Supplement: pone.0101357.s001.pdf [file pone.0101357.s001.pdf]

## DyCoNet: a Gephi Plugin for community detection in dynamic biological networks: Supporting Information

Julie Kauffman<sup>1</sup>, Aristotelis Kittas<sup>1</sup>, Laura Bennett<sup>2</sup>, Sophia Tsoka<sup>1,\*</sup>

**1 Department of Informatics, King's College London, Strand, London WC2R 2LS, United Kingdom**

**2 Centre for Process Systems Engineering, Department of Chemical Engineering, University College London, Torrington Place, London WC1E 7JE, United Kingdom**

\* E-mail: sophia.tsoka@kcl.ac.uk

### Tables

| Jaccard Index                        | 0.4  | 0.5  | 0.6  | 0.7  | 0.8  | 0.9  |
|--------------------------------------|------|------|------|------|------|------|
| Number of communities identified     | 15   | 15   | 14   | 14   | 13   | 13   |
| Number of sub-communities identified | 500  | 482  | 498  | 465  | 478  | 504  |
| Average community size               | 42.3 | 42.3 | 19.4 | 19.8 | 2    | 2    |
| Average sub-community size           | 4.8  | 5.17 | 5.6  | 6.1  | 6.39 | 6.03 |
| Average node promiscuity             | 1.74 | 1.73 | 1.83 | 1.85 | 1.9  | 1.94 |

**Table S1.** Effect of the value of Jaccard index used in group matching on community size, number and node promiscuity.
